# Supplementary material for: Reactive sputtering onto an ionic liquid, a new synthesis route for bismuth-based nanoparticles
Source: Royal Society of Chemistry journal article supplement (doi:10.1039/d2nr07028f), 2023-01-01
Supplement: d2nr07028f1.pdf [file d2nr07028f1.pdf]

## Supporting Information

### Reactive Sputtering onto an Ionic Liquid, A New Synthesis Route of Bismuth-Based Nanoparticles

Sara Ibrahim, Vitalios Ntomprougkidis, Mathias Goutte, Guillaume Monier, Mounir Traïkia, Jean-Michel Andanson, Pierre Bonnet, Angelique Bousquet \*

#### Synthesis of bismuth-based nanoparticles

##### *Preparation of grids for TEM and HR-TEM:*

A drop of IL-containing NPs is placed on a TEM grid without washing or diluting. A lint-free absorbent paper is used to absorb a large amount of the liquid. Then, the excess is sponged without breaking down the grid film. The remaining small quantity of IL, which can withstand the vacuum, still has a slight effect on the measurements.

##### *Extraction of NPs from IL:*

The NPs dispersion into IL, diluted with ethanol, are ultracentrifuged for 30 min. Then the supernatant was carefully removed and ethanol was added again, before a second step of ultracentrifugation for 15 min. Several steps are then performed to collect NPs dispersed into ethanol. This dispersion can then be put on various supports for material characterization. The ethanol will evaporate, leaving only the NPs.

#### Sputtering Bismuth target in Ar plasma

The EDS data obtained simultaneously clearly confirm that the imaged nanoparticles are Bi-based compounds (**Figure S.1**). The presence of C, N, O, F and S atoms is due to the presence of a persistent layer of IL.

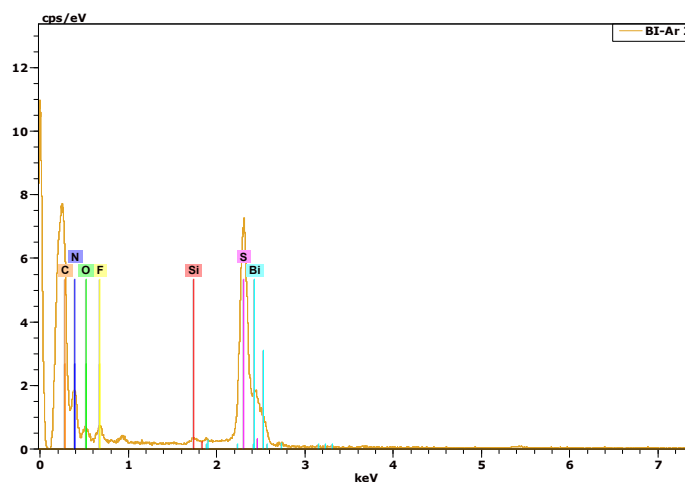

FIGURE S.1: EDS spectrum obtained on the NPS sputtered with Ar plasma onto the IL.

The XPS spectra of C 1s and O 1s are plotted on Figure S2 for NPs synthesis in pure argon plasma. To better distinguish contributions from Bi-based compound and IL, the XPS

spectra was also recorded for metallic powder dispersed into IL and then extracted from it by the same protocol than for NPs.

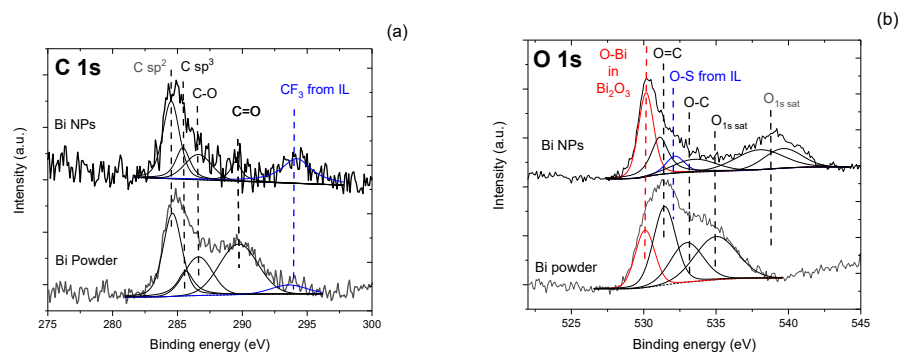

FIGURE S.2: (a) C 1s and (b) O 1s XPS spectra for NPs produced in pure Ar plasma compared to metallic powder.

### Interaction of plasma with IL

In the **Figure S.3a**, is plotted the measured UV-visible spectra of IL before and after exposure to Ar, Ar/O<sub>2</sub> and Ar/O<sub>2</sub>/CF<sub>4</sub> plasmas for 1 hour. In the section 3.1 of the paper, the  $\Delta(\text{absorbance})$  is plotted, which corresponds to the absorbance for IL after plasma exposure subtracted by the absorbance of initial IL. In the **Figure S.3b-c**, the <sup>13</sup>C and <sup>19</sup>F spectra show no differences after plasma treatment in Ar/O<sub>2</sub>/CF<sub>4</sub> compared to initial ionic liquid.

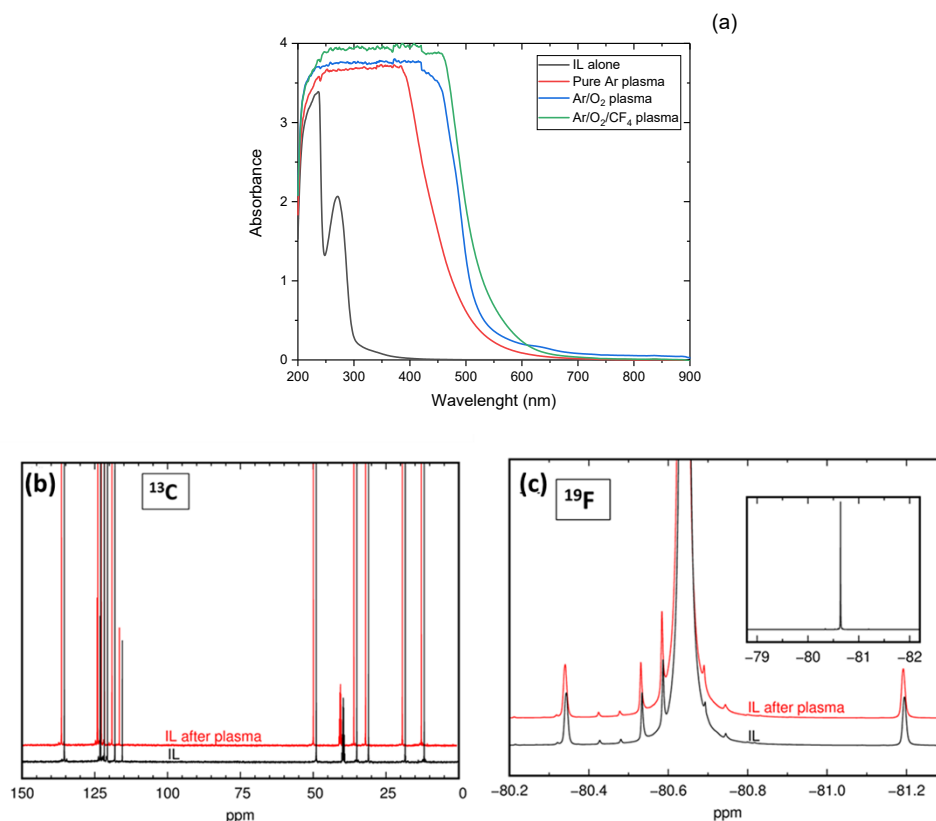

FIGURE S.3: Measured UV-visible spectra (a) for IL before and after exposure to Ar, Ar/O<sub>2</sub> and Ar/O<sub>2</sub>/CF<sub>4</sub> plasmas for 1 hour and, (b) <sup>13</sup>C and (c) <sup>19</sup>F spectra of IL before and after plasma treatment in Ar/O<sub>2</sub>/CF<sub>4</sub>.

### Sputtering Bismuth target in Ar/O<sub>2</sub>/CF<sub>4</sub> plasma

In the **Figure S.4**, is plotted the measured UV-visible spectra of IL before and after sputtering in various Ar/O<sub>2</sub>/CF<sub>4</sub> plasma mixtures. Again, in the section 3.2.2 of the paper, the  $\Delta(\text{absorbance})$  is plotted.

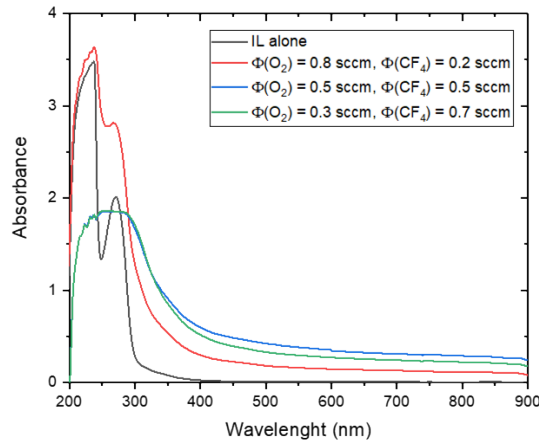

FIGURE S.4: Measured UV-visible spectra for IL before and after Bismuth target sputtering in various Ar/O<sub>2</sub>/CF<sub>4</sub> plasma mixtures.

Since BiO<sub>0.5</sub>F<sub>2</sub> has a band gap around 4.0 eV, the absorbance in visible range is linked to the presence of Bi metallic domain. In the **Figure S.5**, the the absorbance at 650 nm measured by UV-visible spectroscopy for NPs dispersion into IL and for thin films deposited on quartz indicated the metallic Bi content into both kind of samples obtained in the same conditions (same target applied power, Ar flow rate, O<sub>2</sub> + CF<sub>4</sub> flow rate, pressure) for various O<sub>2</sub> to CF<sub>4</sub> flow rates ratio. For thin films, the metallic domains are observed only for O<sub>2</sub> flow rate below 0.5; whereas absorbance continues to be significantly high for NPs dispersion.

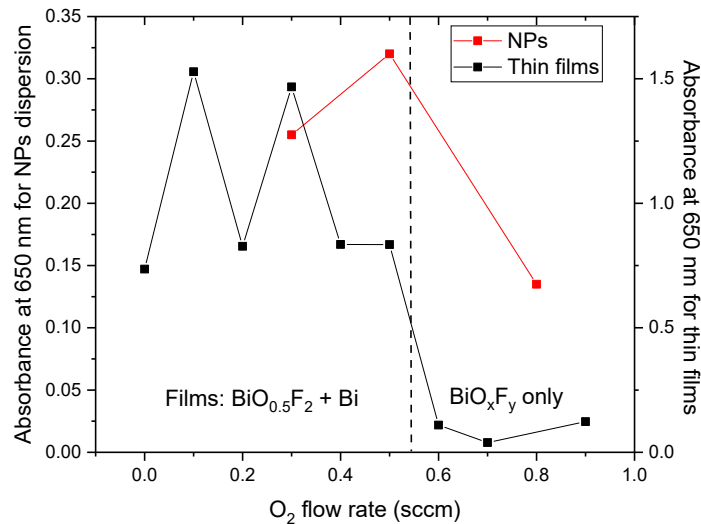

FIGURE S.5: Absorbance at 650 nm for NPs dispersion and for thin films deposited on quartz substrate in the same condition, depending on the O<sub>2</sub> flow rate.

### Exposure of a metallic Bismuth film to a Ar/CF<sub>4</sub> plasma

In the **Figure S.6**, the pattern of metallic Bismuth thin film is plotted before and after its direct exposure for one hour to a Ar/CF<sub>4</sub> MW plasma. Before plasma exposure, the referenced diffraction peaks correspond to Bi phase. After, these peaks are drastically reduced and some new ones (indicated with red arrows) appears. The metallic thin film is highly modified by the plasma.

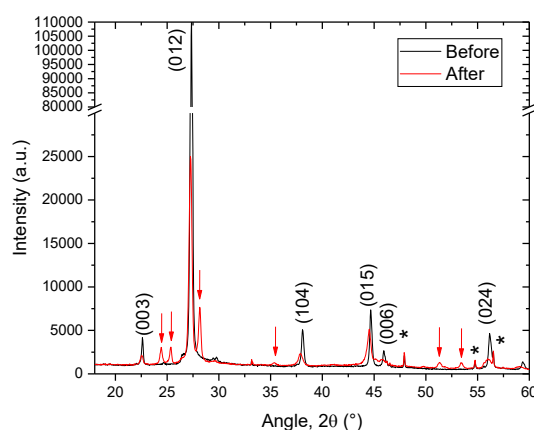

FIGURE S.6: XRD patterns of metallic Bismuth thin film before and after its direct exposure for one hour to a Ar/CF<sub>4</sub> MW plasma. The plane indexes and \* refer to Bi phase and Si substrate respectively; while the arrows indicate the presence of a new phase after plasma exposure.
